# Supplementary material
Source: PubMed Central journal article supplement (PMC4929621)
Supplement: NIHMS687676-supplement-304521R1_Figure_reprint_permissions.pdf [file NIHMS687676-supplement-304521R1_Figure_reprint_permissions.pdf]

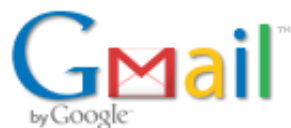

林明聡 &lt;m-h4510@nms.ac.jp&gt;

## Thank you for your RightsLink / Elsevier transaction

1 件のメッセージ

**Copyright Clearance Center** <rightslink@marketing.copyright.com>

2015年3月16日 15:49

返信先: Copyright Clearance Center &lt;reply-fe4e10777062037e7c1c-14153369\_HTML-1184031974-114453-174827@info.copyright.com&gt;

To: m-h4510@nms.ac.jp

To view this email as a web page, go [here](#).**Do Not Reply Directly to This Email**To ensure that you continue to receive our emails,  
please add [rightslink@marketing.copyright.com](mailto:rightslink@marketing.copyright.com) to your [address book](#).

# RightsLink

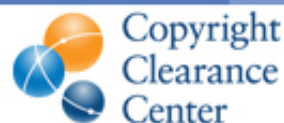

## Thank You For Your Order!

Dear Dr. Meiso Hayashi,

Thank you for placing your order through Copyright Clearance Center's RightsLink service. Elsevier has partnered with RightsLink to license its content. This notice is a confirmation that your order was successful.

Your order details and publisher terms and conditions are available by clicking the link below:

<http://s100.copyright.com/CustomerAdmin/PLF.jsp?ref=dd18fa30-a87a-4e28-b9b7-3ab5d1432edb>**Order Details**

Licensee: Meiso Hayashi

License Date: Mar 16, 2015

License Number: 3590631237474

Publication: Resuscitation

Title: Global incidences of out-of-hospital cardiac arrest and survival rates: Systematic review of 67 prospective studies

Type Of Use: reuse in a journal/magazine

Total: 0 JPY

To access your account, please visit <https://myaccount.copyright.com>.

Please note: Online payments are charged immediately after order confirmation; invoices are issued daily and are payable immediately upon receipt.

To ensure that we are continuously improving our services, please take a moment to complete our [customer satisfaction survey](#).**B.1:v4.2**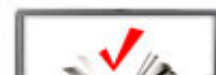

**+1-855-239-3415 / Tel: +1-978-646-2777**  
**customer care@copyright.com**  
**http://www.copyright.com**

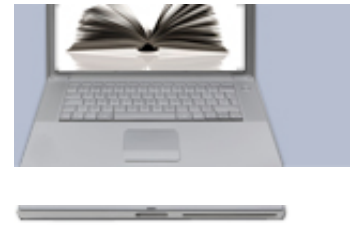

This email was sent to: [m-h4510@nms.ac.jp](mailto:m-h4510@nms.ac.jp)

Please visit [Copyright Clearance Center](#) for more information.

This email was sent by Copyright Clearance Center  
222 Rosewood Drive Danvers, MA 01923 USA

To view the privacy policy, please [go here](#).



林明聡 &lt;m-h4510@nms.ac.jp&gt;

## Thank you for your RightsLink / Wolters Kluwer Health transaction

2 件のメッセージ

**Copyright Clearance Center** <rightslink@marketing.copyright.com>

2015年3月13日 19:39

返信先: Copyright Clearance Center &lt;reply-fe4e10777062037e7c1c-14153369\_HTML-1184031974-114453-173454@info.copyright.com&gt;

To: m-h4510@nms.ac.jp

To view this email as a web page, go [here](#).**Do Not Reply Directly to This Email**To ensure that you continue to receive our emails,  
please add [rightslink@marketing.copyright.com](mailto:rightslink@marketing.copyright.com) to your [address book](#).

# RightsLink



## Thank You For Your Order!

Dear Dr. Meiso Hayashi,

Thank you for placing your order through Copyright Clearance Center's RightsLink service. Wolters Kluwer Health has partnered with RightsLink to license its content. This notice is a confirmation that your order was successful.

Your order details and publisher terms and conditions are available by clicking the link below:

<http://s100.copyright.com/CustomerAdmin/PLF.jsp?ref=eccb4fa9-1cad-404e-8a36-18541c7190d3>**Order Details**

Licensee: Meiso Hayashi

License Date: Mar 13, 2015

License Number: 3586990207010

Publication: Circulation: Arrhythmia and Electrophysiology

Title: Smoking, Smoking Cessation, and Risk of Sudden Cardiac Death in Women

Type Of Use: Journal/Magazine

Total: 0 JPY

To access your account, please visit <https://myaccount.copyright.com>.

Please note: Online payments are charged immediately after order confirmation; invoices are issued daily and are payable immediately upon receipt.

To ensure that we are continuously improving our services, please take a moment to complete our [customer satisfaction survey](#).**B.1:v4.2**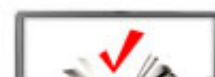

+1-855-239-3415 / Tel: +1-978-646-2777  
customercare@copyright.com  
<http://www.copyright.com>

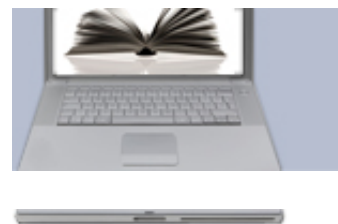

This email was sent to: [m-h4510@nms.ac.jp](mailto:m-h4510@nms.ac.jp)

Please visit [Copyright Clearance Center](#) for more information.

This email was sent by Copyright Clearance Center  
222 Rosewood Drive Danvers, MA 01923 USA

To view the privacy policy, please [go here](#).

---

**Copyright Clearance Center** <[rightslink@marketing.copyright.com](mailto:rightslink@marketing.copyright.com)> 2015年3月13日 19:42  
返信先: Copyright Clearance Center <[reply-fe4e10777062037e7c1c-14153369\\_HTML-1184031974-114453-173456@info.copyright.com](mailto:reply-fe4e10777062037e7c1c-14153369_HTML-1184031974-114453-173456@info.copyright.com)>  
To: [m-h4510@nms.ac.jp](mailto:m-h4510@nms.ac.jp)

To view this email as a web page, go [here](#).

**Do Not Reply Directly to This Email**

To ensure that you continue to receive our emails,  
please add [rightslink@marketing.copyright.com](mailto:rightslink@marketing.copyright.com) to your address book.

RightsLink

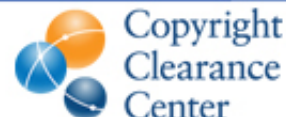

## Thank You For Your Order!

Dear Dr. Meiso Hayashi,

Thank you for placing your order through Copyright Clearance Center's RightsLink service. Wolters Kluwer Health has partnered with RightsLink to license its content. This notice is a confirmation that your order was successful.

Your order details and publisher terms and conditions are available by clicking the link below:

<http://s100.copyright.com/CustomerAdmin/PLF.jsp?ref=8bce01fa-1db5-49a5-8f56-823df4d5f9c5>

### Order Details

Licensee: Meiso Hayashi  
License Date: Mar 13, 2015  
License Number: 3586990392699

Publication: Circulation  
Title: Sports-Related Sudden Death in the General Population  
Type Of Use: Journal/Magazine  
Total: 0 JPY

To access your account, please visit <https://myaccount.copyright.com>.

Please note: Online payments are charged immediately after order confirmation; invoices are issued daily and are payable immediately upon receipt.

To ensure that we are continuously improving our services, please take a moment to complete our [customer satisfaction survey](#).

**B.1:v4.2**

**+1-855-239-3415 / Tel: +1-978-646-2777**  
**customercare@copyright.com**  
**<http://www.copyright.com>**

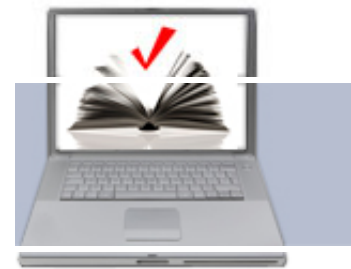

[元のメッセージ非表示]



林明聡 &lt;m-h4510@nms.ac.jp&gt;

## Thank you for your RightsLink / Oxford University Press transaction

1 件のメッセージ

**Copyright Clearance Center** <rightslink@marketing.copyright.com>

2015年3月13日 19:49

返信先: Copyright Clearance Center &lt;reply-fe4e10777062037e7c1c-14153369\_HTML-1184031974-114453-173464@info.copyright.com&gt;

To: m-h4510@nms.ac.jp

To view this email as a web page, go [here](#).**Do Not Reply Directly to This Email**To ensure that you continue to receive our emails,  
please add [rightslink@marketing.copyright.com](mailto:rightslink@marketing.copyright.com) to your [address book](#).

# RightsLink

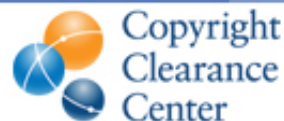

## Thank You For Your Order!

Dear Dr. Meiso Hayashi,

Thank you for placing your order through Copyright Clearance Center's RightsLink service. Oxford University Press has partnered with RightsLink to license its content. This notice is a confirmation that your order was successful.

Your order details and publisher terms and conditions are available by clicking the link below:

<http://s100.copyright.com/CustomerAdmin/PLF.jsp?ref=52286edf-8218-47b2-b0d3-bd607ce1841b>**Order Details**

Licensee: Meiso Hayashi

License Date: Mar 13, 2015

License Number: 3586990790427

Publication: European Heart Journal

Title: A novel clinical risk prediction model for sudden cardiac death in hypertrophic cardiomyopathy (HCM Risk-SCD)

Type Of Use: Journal/Magazine

Total: 0 JPY

To access your account, please visit <https://myaccount.copyright.com>.

Please note: Online payments are charged immediately after order confirmation; invoices are issued daily and are payable immediately upon receipt.

To ensure that we are continuously improving our services, please take a moment to complete our [customer satisfaction survey](#).**B.1:v4.2**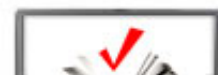

**+1-855-239-3415 / Tel: +1-978-646-2777**  
**customercare@copyright.com**  
**http://www.copyright.com**



This email was sent to: [m-h4510@nms.ac.jp](mailto:m-h4510@nms.ac.jp)

Please visit [Copyright Clearance Center](#) for more information.

This email was sent by Copyright Clearance Center  
222 Rosewood Drive Danvers, MA 01923 USA

To view the privacy policy, please [go here](#).

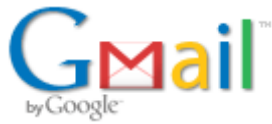

林明聡 &lt;m-h4510@nms.ac.jp&gt;

## Thank you for your RightsLink / Oxford University Press transaction

1 件のメッセージ

**Copyright Clearance Center** <rightslink@marketing.copyright.com>

2015年3月18日 0:39

返信先: Copyright Clearance Center &lt;reply-fe4e10777062037e7c1c-14153369\_HTML-1184031974-114453-176347@info.copyright.com&gt;

To: m-h4510@nms.ac.jp

To view this email as a web page, go [here](#).**Do Not Reply Directly to This Email**To ensure that you continue to receive our emails,  
please add [rightslink@marketing.copyright.com](mailto:rightslink@marketing.copyright.com) to your address book.

# RightsLink

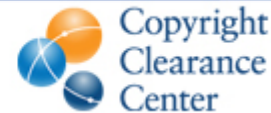

## Thank You For Your Order!

Dear Dr. Meiso Hayashi,

Thank you for placing your order through Copyright Clearance Center's RightsLink service. Oxford University Press has partnered with RightsLink to license its content. This notice is a confirmation that your order was successful.

Your order details and publisher terms and conditions are available by clicking the link below:

<http://s100.copyright.com/CustomerAdmin/PLF.jsp?ref=49711bf4-53a2-44fd-9357-cede642c34b0>

**Order Details**

Licensee: Meiso Hayashi

License Date: Mar 17, 2015

License Number: 3591411507286

Publication: European Heart Journal

Title: 2014 ESC Guidelines on diagnosis and management of hypertrophic cardiomyopathy

Type Of Use: Journal/Magazine

Total: 0 JPY

To access your account, please visit <https://myaccount.copyright.com>.

Please note: Online payments are charged immediately after order confirmation; invoices are issued daily and are payable immediately upon receipt.

To ensure that we are continuously improving our services, please take a moment to complete our [customer satisfaction survey](#).

**B.1:v4.2**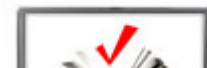



+1-855-239-3415 / Tel: +1-978-646-2777  
customer@copyright.com  
http://www.copyright.com

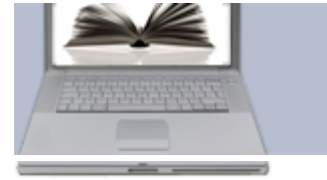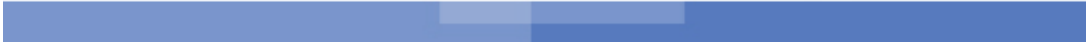

WkLv#hp dl#z dv#v#hqw#e=#m-h4510@nms.ac.jp

Please visit [Copyright Clearance Center](#) for more information.

WkLv#hp dl#z dv#v#hqw#e | #r rs | uljkw#F dndudqfh#F hqw#hu  
555#Jrvhz rrg#G ulyh#G dgyhuw/#P D#34<56#KVD

Wr#y#hz #kh#sulydf | #s rdf | /#s dhdvh#go here1
